# Supplementary material for: The 5-Hydroxymethylcytosine Landscape of Prostate Cancer
Source: PubMed Central journal article supplement (PMC9627125; doi:10.1158/0008-5472.can-22-1123), 2022-10-17
Supplement: can-22-1123_supplementary_figures_suppsf1-sf9.pdf [file can-22-1123_supplementary_figures_suppsf1-sf9.pdf]

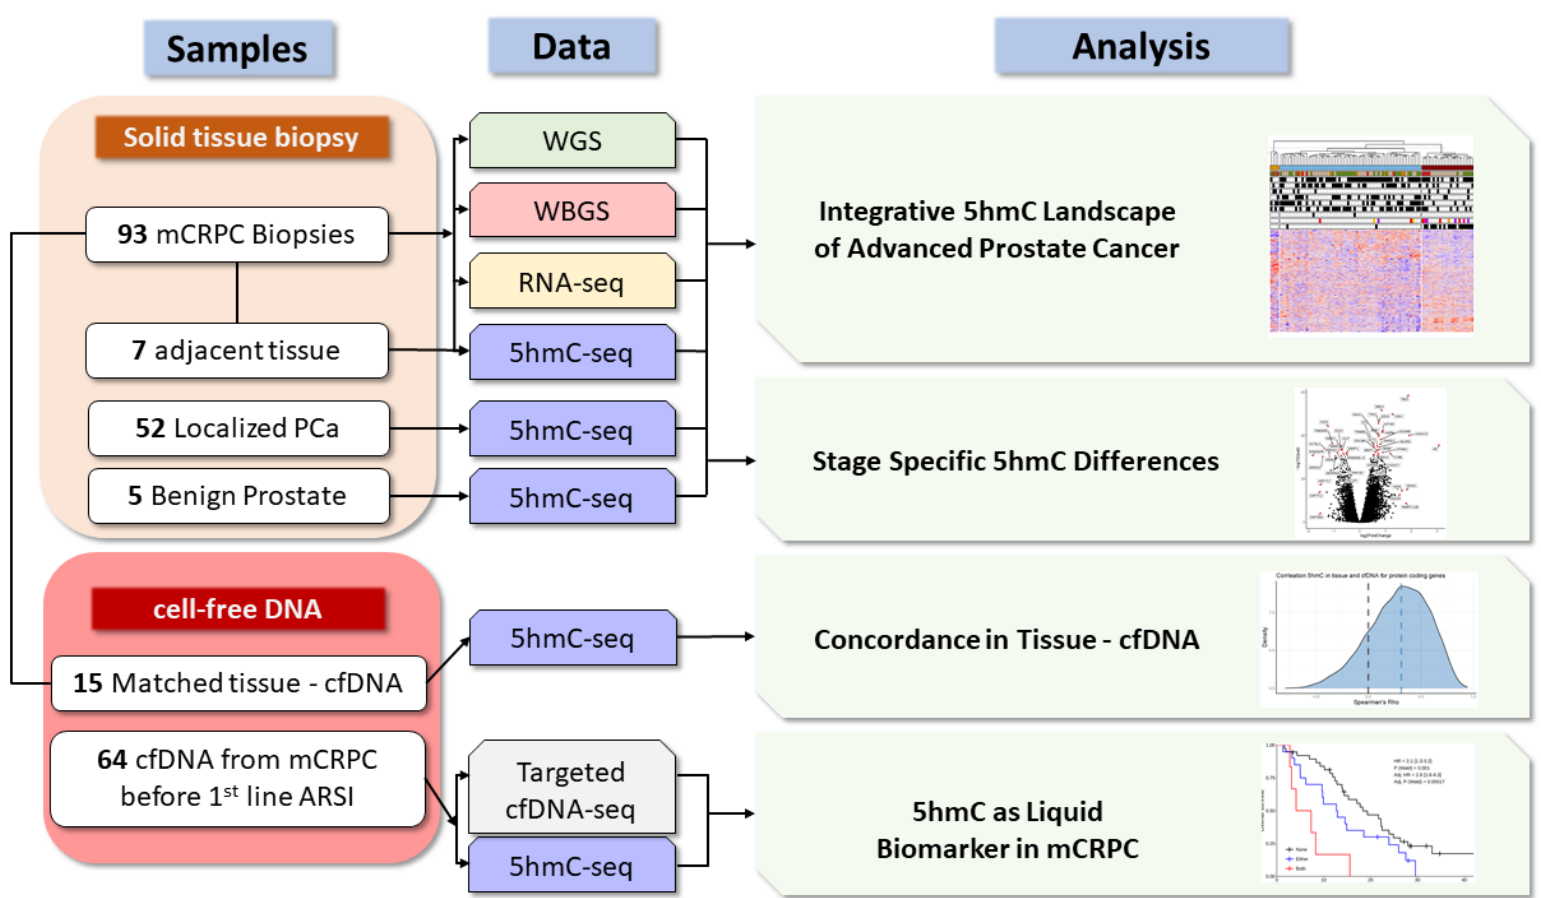

**Figure S1. Study overview.**

mCRPC; metastatic castration-resistant prostate cancer, PCa; prostate cancer, cfDNA; cell-free DNA, ARSI; androgen receptor signaling inhibitor, WGS; whole-genome sequencing, WGBS; whole-genome bisulfite sequencing.

Expression level — High — Medium — Low

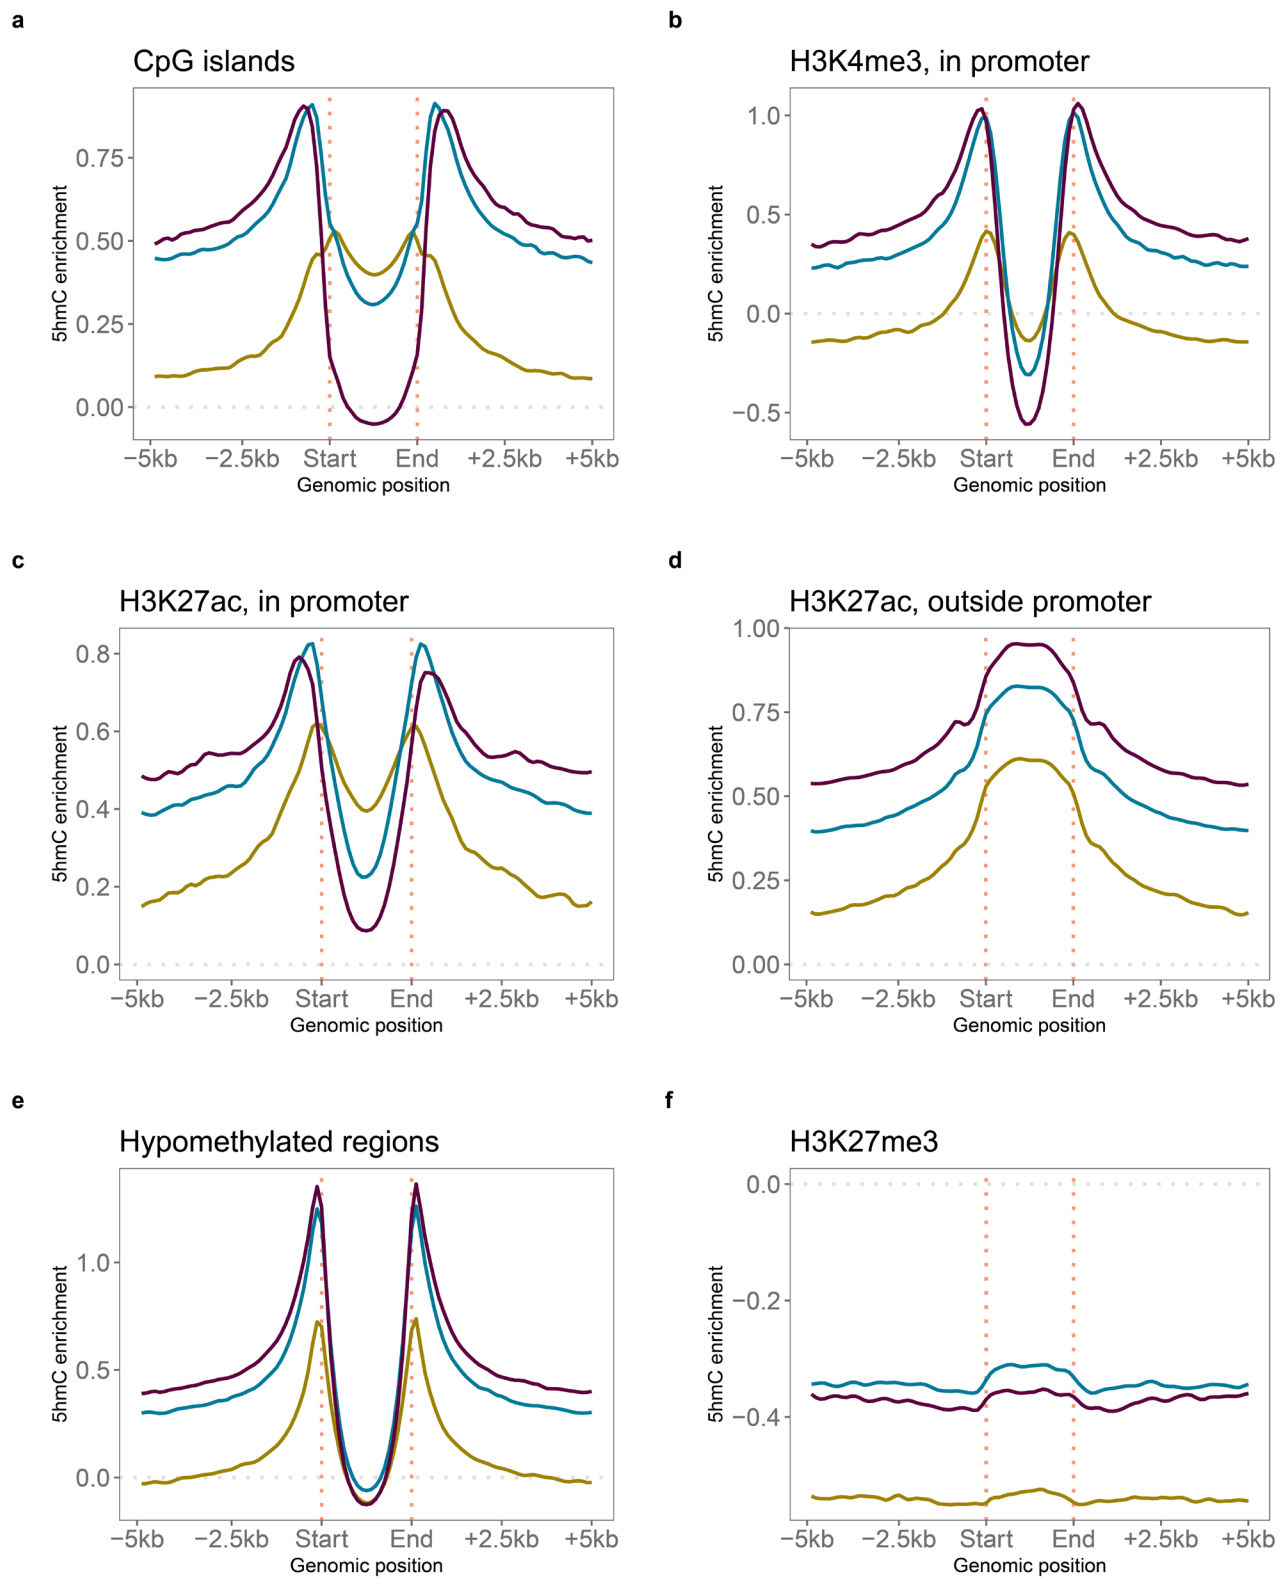

**Figure S2. 5hmC enrichment at different genomic features.**

The respective region types were mapped to the closest gene and genes were split by tertiles of expression levels per sample. Log<sub>2</sub> 5hmC enrichment over input control (similar to low-pass WGS without 5hmC enrichment) was calculated for each group of genes per sample and results were then averaged for the 93 mCRPC tissue samples. Regions analyzed were **a)** CpG islands, **b)** H3K4me3 marked regions overlapping promoters, **c)** H3K27ac marked regions overlapping promoters, **d)** H3K27ac marked regions not overlapping promoters (putative enhancers), **e)** Hypomethylated regions as defined by whole-genome bisulfite sequencing per sample, and **f)** H3K27me3 marks (considered representative of condensed chromatin). CpG islands annotation was from the UCSC Genome browser track and ChIP-seq data from publicly available data (1).

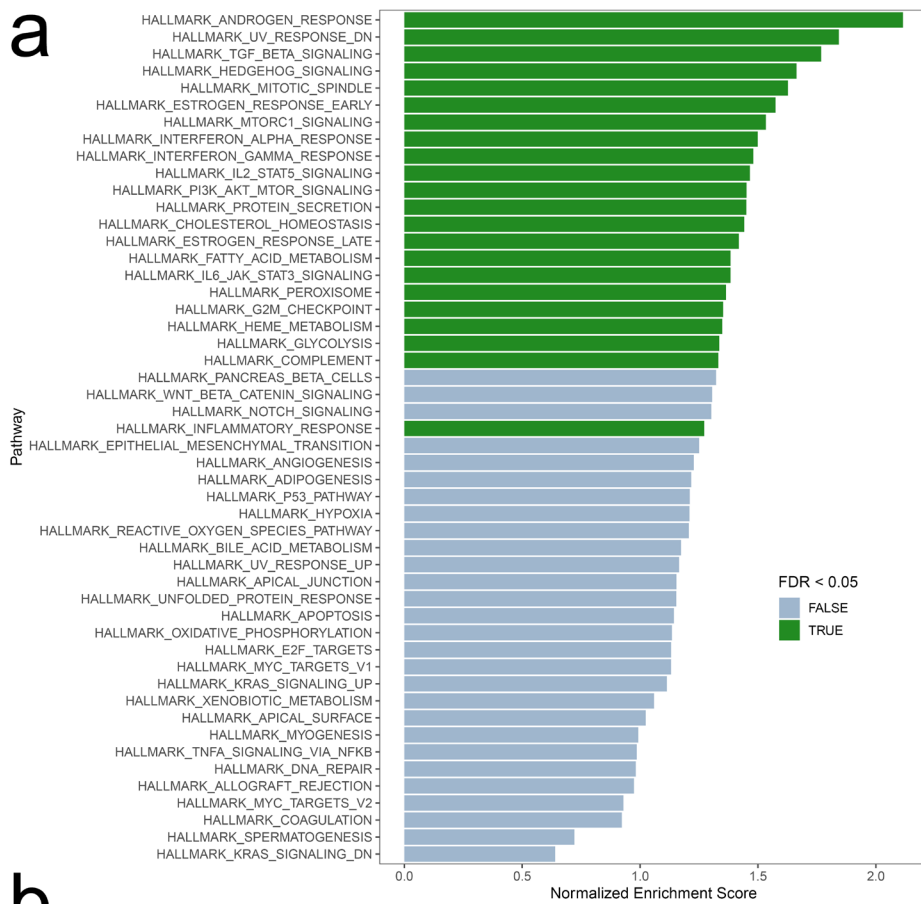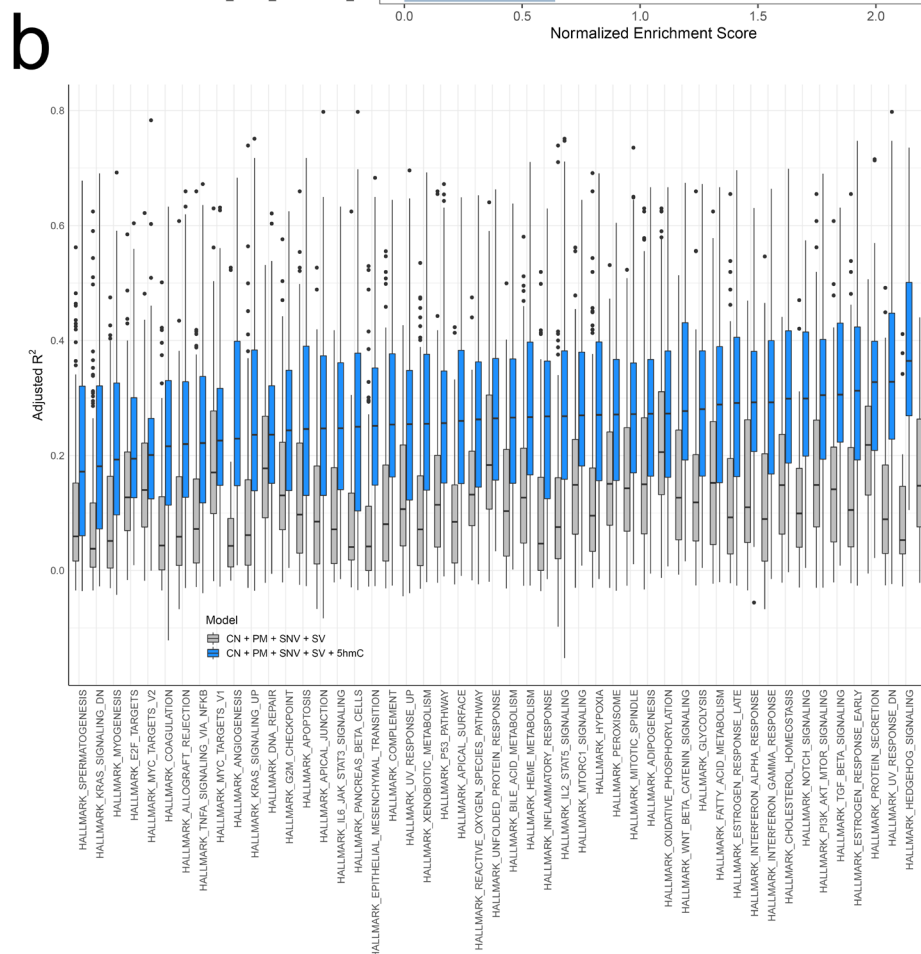

**Figure S3. Gene expression and 5hmC levels for the Cancer Hallmark Pathways.**

**a)** Gene set enrichment analysis for genes ranked by strength of 5hmC gene body count and gene expression correlation for the MSigDB Cancer Hallmark pathways. **b)** Gene expression was modeled for each gene by promoter methylation (PM), copy number (CN), single-nucleotide variants (SNV), structural variants (SV) and 5hmC gene body counts (5hmC). Gene expression and 5hmC gene body counts were scaled (transformed to Z-score) to give comparable coefficients. Grey boxes represent the adjusted R-square of the model without 5hmC while the blue boxes represent the adjusted R-square of the model including 5hmC. Analysis was done for 93 mCRPC samples. Boxplot shows median with hinges at 25th and 75th percentiles and whiskers at largest/smallest value within 1.5 \* inter quartile range.

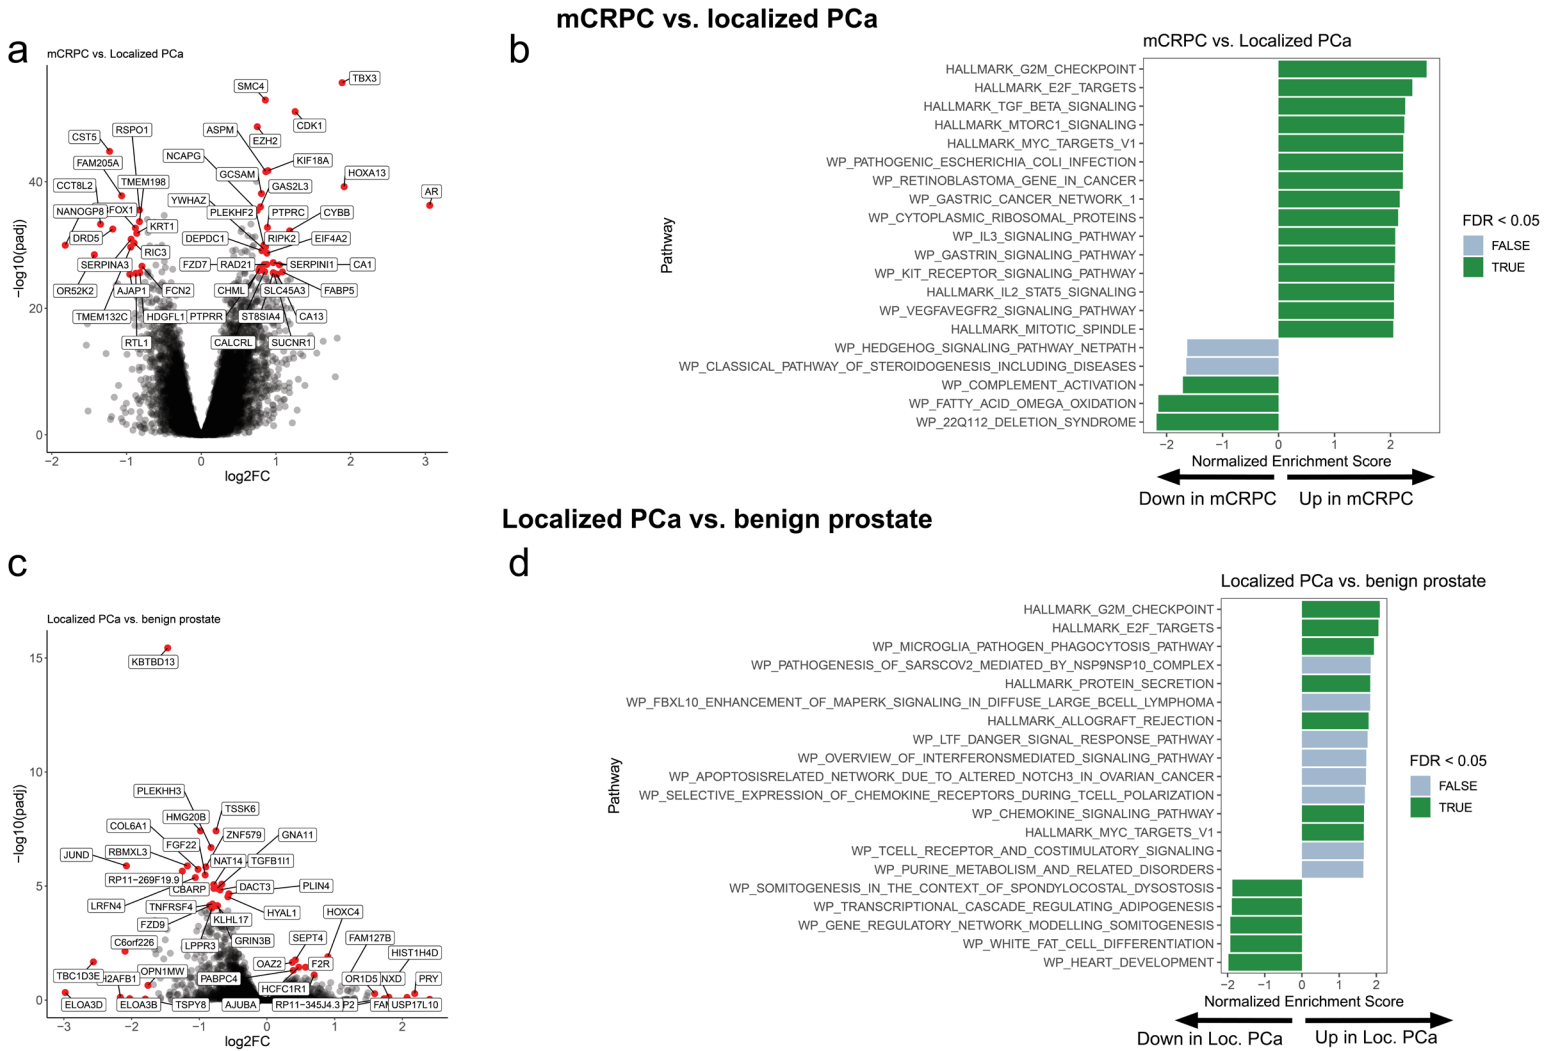

**Figure S4. Differential 5hmC analysis between different states of disease.**

**a)** Volcano plot of differential 5hmC gene body counts between mCRPC (N=93) and localized prostate cancer (N=52). Top differential genes are marked in red. **b)** Gene set enrichment analysis of differential 5hmC gene body counts between mCRPC and localized prostate cancer. The top 15 up regulated and bottom 5 down regulated pathways by normalized enrichment score are shown. **c)** Volcano plot of differential 5hmC gene body counts between localized prostate cancer and benign prostate (N=5). Top differential genes are marked in red. **d)** Gene set enrichment analysis of differential 5hmC gene body counts between localized prostate cancer and benign prostate. The top 15 up regulated and bottom 5 down regulated pathways by normalized enrichment score are shown.

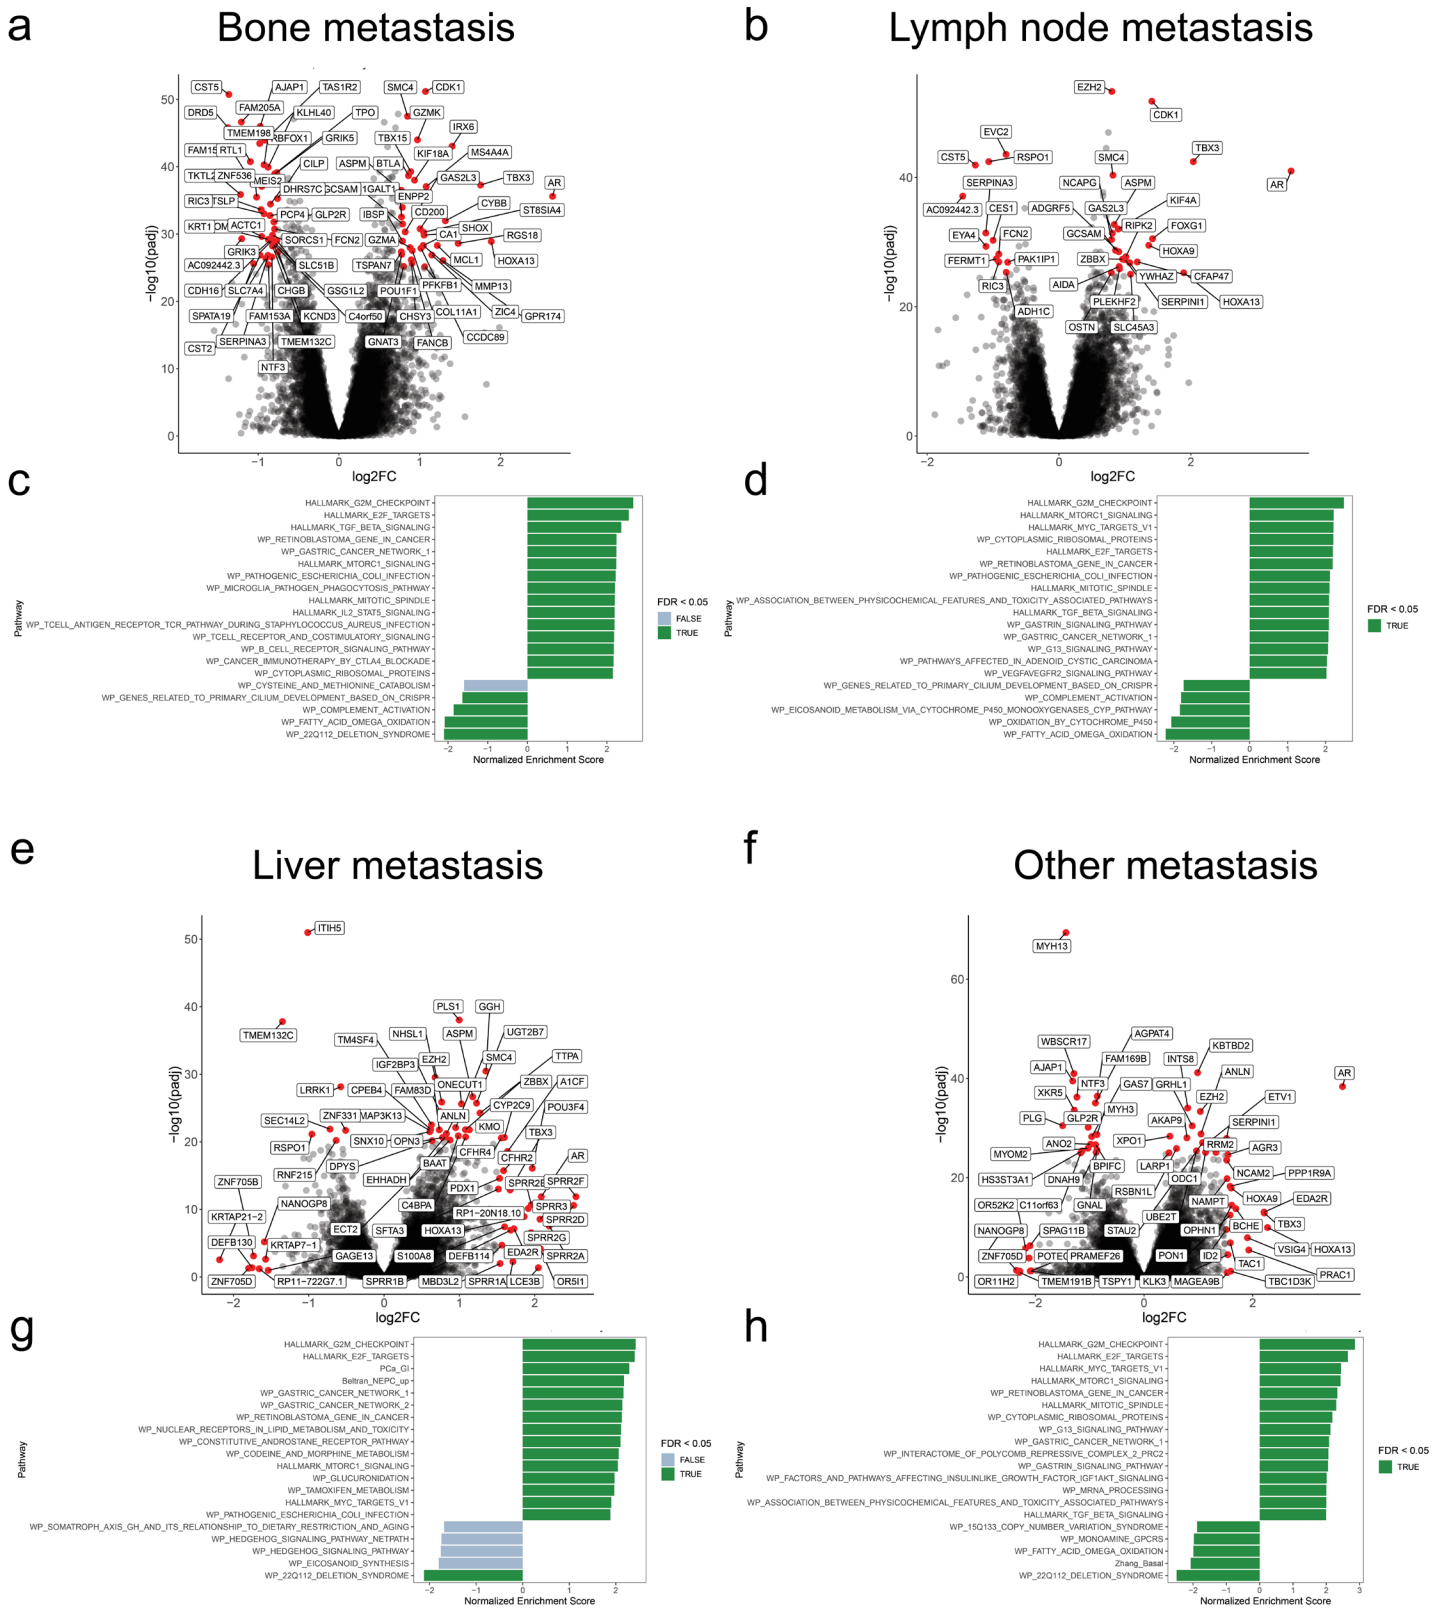

**Figure S5. Differential 5hmC analysis between mCRPC and localized prostate cancer stratified for metastatic site.**

**a,b,e,f)** Volcano plots of differential 5hmC gene body counts between mCRPC and localized prostate cancer (N=52), stratified for metastatic site (bone N=42, lymph node N=34, liver N=11, other N=6). Other means other metastatic soft tissue site. Top differential genes are marked in red. **c,d,g,h)** Gene set enrichment analysis of differential 5hmC gene body counts between mCRPC and localized prostate cancer, stratified for metastatic site. The top 15 up regulated and bottom 5 down regulated pathways by normalized enrichment score are shown.

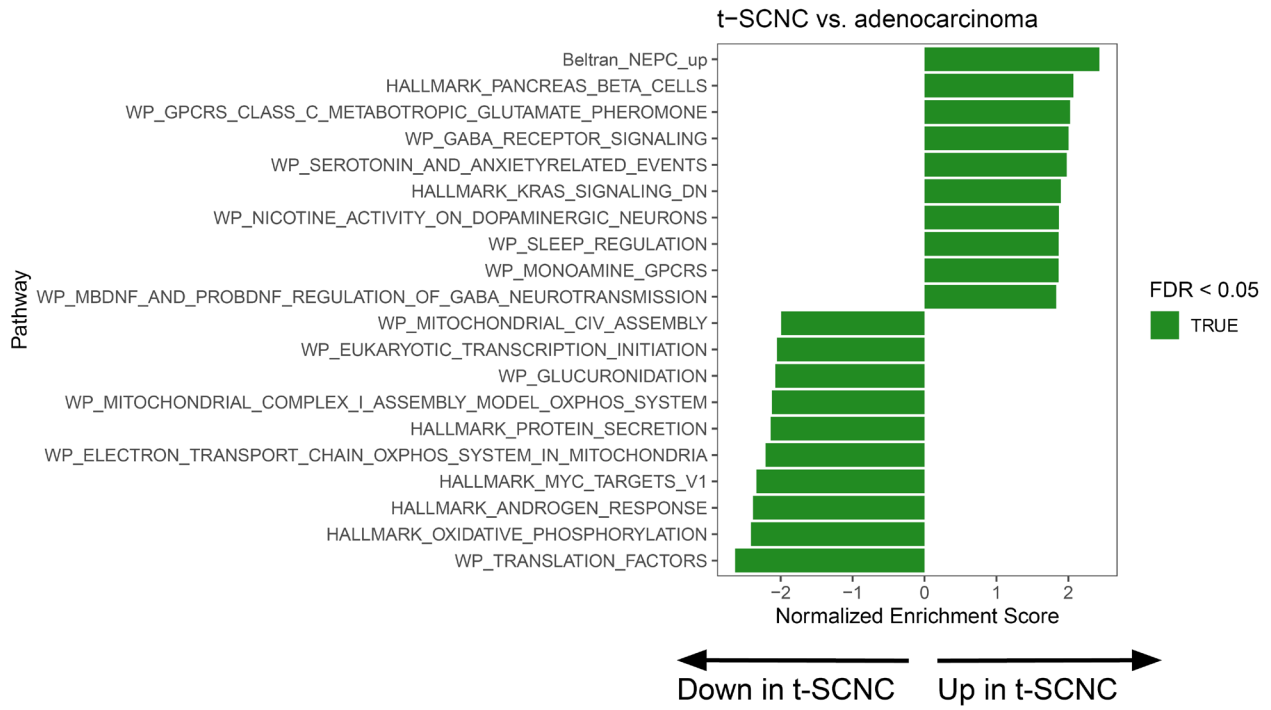

**Figure S6. Differential 5hmC analysis between treatment-emergent small cell neuroendocrine prostate cancer (t-SCNC) and adenocarcinoma.**

Gene set enrichment analysis of genes ranked by differential 5hmC gene body counts between cluster 1 (treatment-emergent small cell neuroendocrine cancer, N=4) and cluster 2+3 (adenocarcinoma, N=89). The top 10 up regulated and bottom 10 down regulated pathways by normalized enrichment score are shown. t-SCNC; treatment-emergent small cell neuroendocrine cancer.

# FOXA1

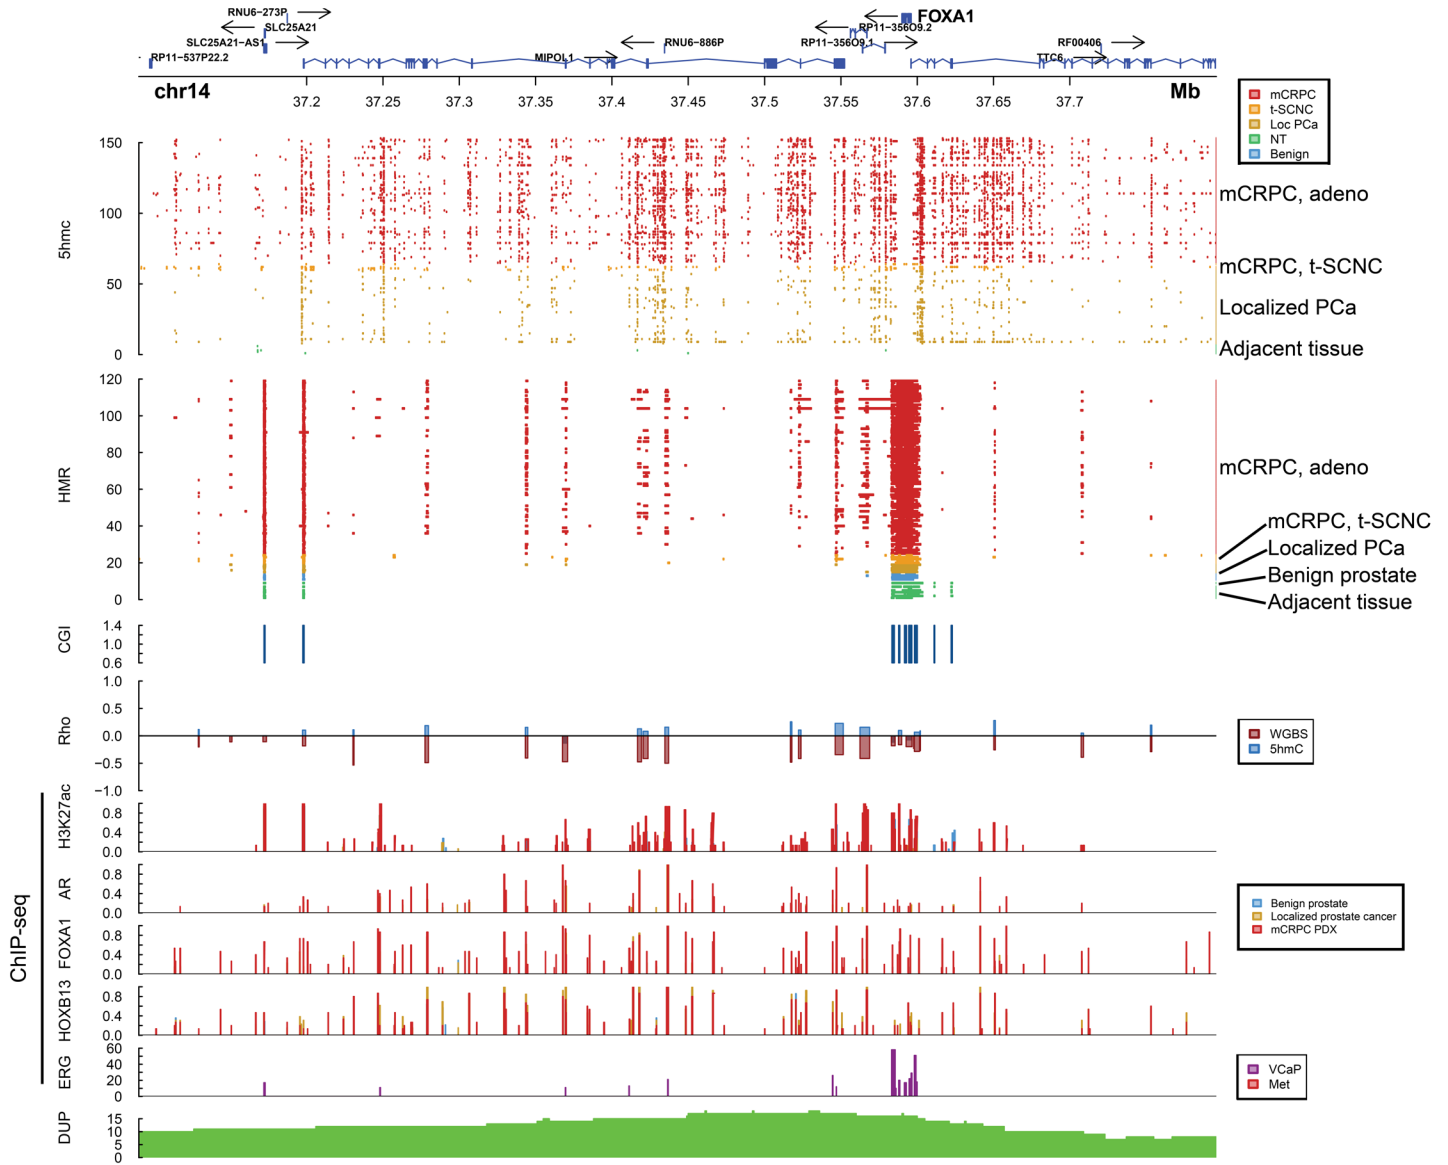

**Figure S7. 5hmC marks activity of the *FOXA1* locus.**

Integration of multiple layers of data for the *FOXA1* locus. 5hmC represents peaks called by MACS2 for each sample. HMR; hypomethylated regions called by whole-genome bisulfite sequencing per sample. CGI; CpG islands, Rho; Spearman's correlation between 5hmC peaks and gene expression, and methylation levels by whole-genome bisulfite sequencing, respectively, ChIP-seq; chromatin immunoprecipitation sequencing from publicly available patient samples, xenografts and cell lines. DUP; number of mCRPC samples with tandem duplications. Benign; benign prostate tissue, Localized; localized prostate cancer, mCRPC; metastatic castration-resistant prostate cancer, NT; normal adjacent tissue (to mCRPC biopsy).

**a**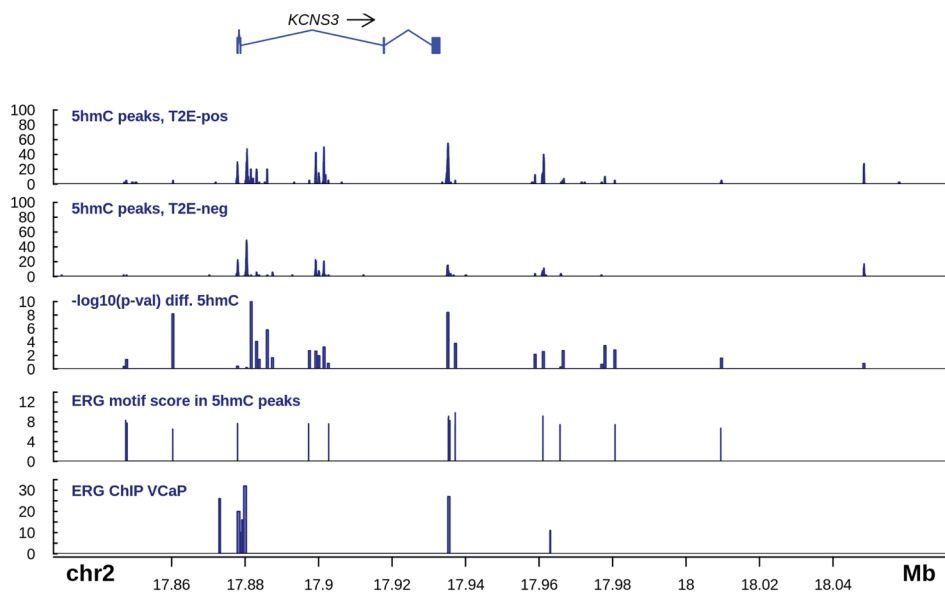**b**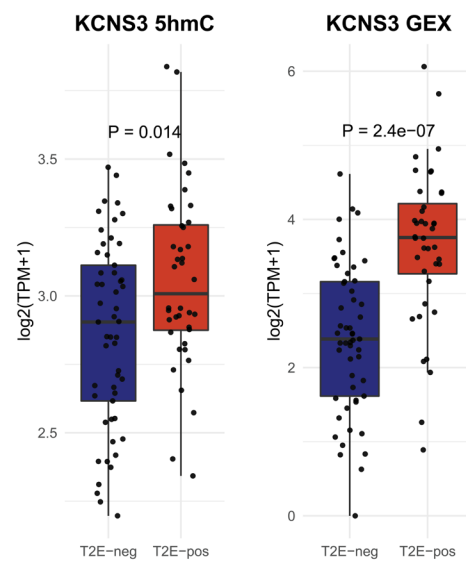

**Figure S8. The *ERG*-regulated gene *KCNS3* has increased gene expression and 5hmC gene body counts and 5hmC is enriched at *ERG* binding motifs in *TPRSS2-ERG* fusion positive samples.**

**a)** 5hmC levels at the *KCNS3* locus. 5hmC levels are shown as frequency of samples with a peak called at every position. Samples are split by *TPRSS2-ERG* fusion status (T2E). P-value is shown for differential 5hmC counts at consensus peaks. The motif score for *ERG* binding was calculated using HOMER for each consensus peak. **b)** 5hmC gene body counts and gene expression of *KCNS3* split by *TPRSS2-ERG* fusion status (T2E-negative N=53, T2E positive N=40). GEX; gene expression.



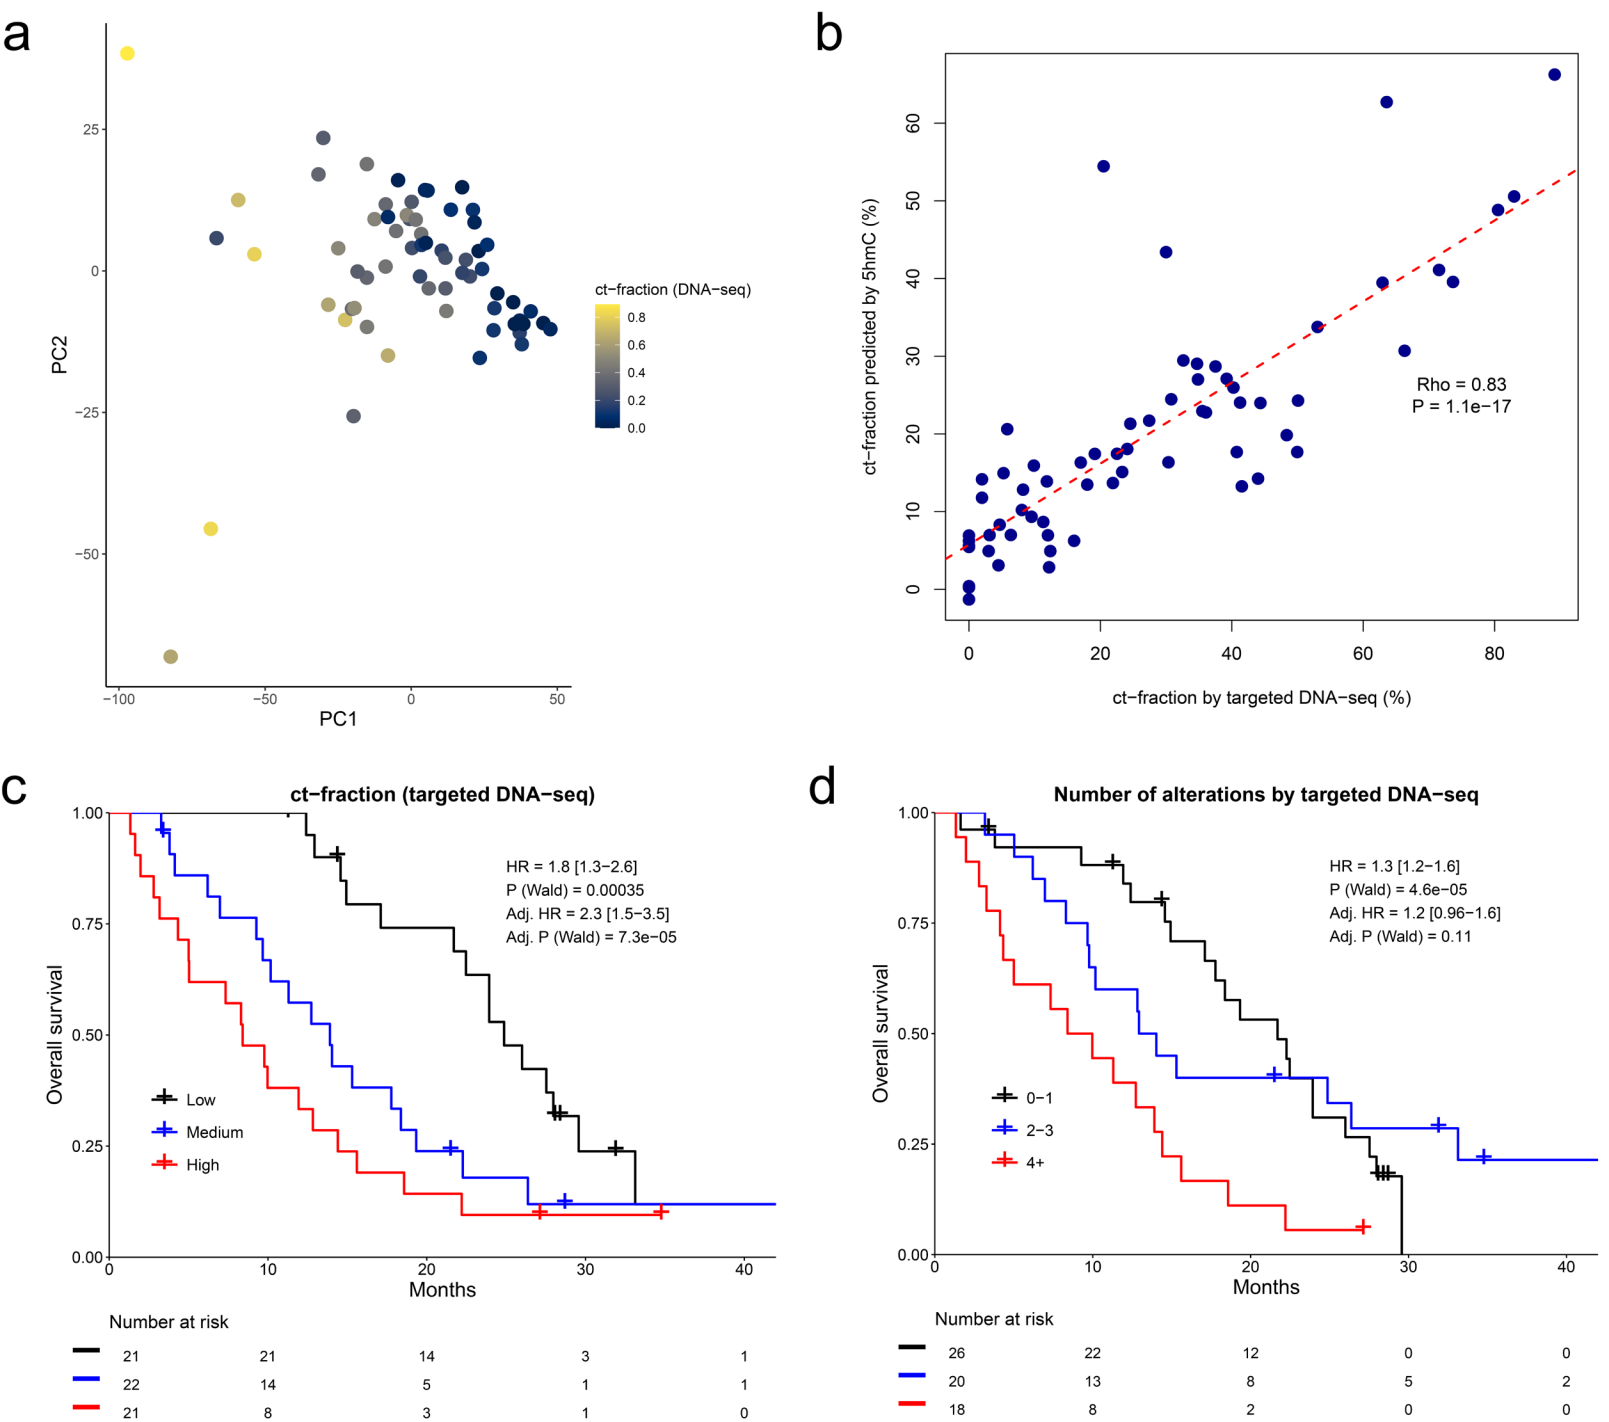

**Figure S9. 5hmC patterns and targeted sequencing of cell-free DNA.**

**a)** Principal component analysis using 5hmC gene body counts of the top 20% most variable protein coding genes. Samples are colored by the ct-fraction estimated by targeted cell-free DNA sequencing. **b)** Scatter plot of estimated ct-fraction by targeted cell-free DNA sequencing and ct-fraction predicted by a novel 5hmC classifier. **c)** Overall survival for patients split by tertiles of predicted ct-fraction from targeted cfDNA sequencing (N=64). **d)** Overall survival based on the number of genomic events inferred by targeted cell-free DNA sequencing of the eight most commonly altered genes. Alterations by targeted cell-free DNA sequencing were defined as *AR* amplification (2 or more extra copies), *MYC* gain (1 or extra more copies) and *NCOA2* gain (1 or more extra copies or a translocation), *NKX3-1* loss (at least one copy lost) *BRCA2* (at least one copy lost or inactivation by SNV or SV), *PTEN* (at least one copy lost or inactivation by SNV or SV), *TP53* (at least one copy loss or inactivation by SNV, SV or translocation) and *RBI* (at least one copy loss or inactivation by SNV or translocation). Kaplan-Meier curves were plotted for 0-1, 2-3 and >3 events, and hazard ratios were calculated as mean for each additional event inferred. P-values were calculated by Wald's test. Adjusted hazard ratios were adjusted for circulating tumor-fraction, age at mCRPC diagnosis, PSA at first-ARSI, Hb at first-line ARSI, type of ARSI (enzalutamide or abiraterone), docetaxel for metastatic hormone-sensitive prostate cancer, time to CRPC from start of ADT and presence of visceral metastases. OS; overall survival, HR; hazard ratio, ARSI; androgen receptor signaling inhibitor, ct-fraction; circulating tumor fraction, SV; structural variant, SNV; single-nucleotide variant.

## References

1. Pomerantz MM, Qiu X, Zhu Y, Takeda DY, Pan W, Baca SC, *et al.* Prostate cancer reactivates developmental epigenomic programs during metastatic progression. *Nature genetics* **2020**;52(8):790-9 doi 10.1038/s41588-020-0664-8.
